# Supplementary material for: Cumulative Resting Heart Rate Exposure and Risk of All-Cause Mortality: Results from the Kailuan Cohort Study
Source: PubMed Central journal article supplement (PMC5220288; doi:10.1038/srep40212), 2017-01-09
Supplement: srep40212-s1.pdf [file srep40212-s1.pdf]

**Full title:** Cumulative Resting Heart Rate Exposure and Risk of All-Cause Mortality:  
Results from the Kailuan Cohort Study

**Authors:** Quanhui Zhao<sup>1,2</sup>, MD\*; Haibin Li<sup>3,4</sup>, MS\*; Anxin Wang<sup>3,4,5</sup>, PhD\*; Jin Guo<sup>3,4</sup>, PhD; Junxing Yu, MD<sup>1,2\*</sup>; Yanxia Luo<sup>3,4</sup>, PhD; Shuohua Chen<sup>2</sup>, MD; Lixin Tao<sup>3,4</sup>, PhD; Yuqing Li<sup>6</sup>, MD; Aiping Li<sup>7</sup>, MD; Xiuhua Guo<sup>3,4</sup>, PhD<sup>#</sup>; Shouling Wu<sup>2#</sup>, MD

**Author's Affiliation:**

<sup>1</sup> Graduate School, North China University of Science and Technology, Tangshan, China.

<sup>2</sup> Department of Cardiology, Kailuan Hospital, North China University of Science and Technology, Tangshan, China.

<sup>3</sup> Department of Epidemiology and Health Statistics, School of Public Health, Capital Medical University, Beijing, China.

<sup>4</sup> Beijing Municipal Key Laboratory of Clinical Epidemiology, Capital Medical University, Beijing, China.

<sup>5</sup> Department of Neurology, Beijing Tiantan Hospital, Capital Medical University, Beijing, China

<sup>6</sup> Department of Rheumatology, Kailuan Hospital, North China University of Science and Technology, Tangshan, China.

<sup>7</sup> Department of Surgery, Kailuan Hospital, North China University of Science and Technology, Tangshan, China.

## Supplementary Information

**Supplemental Table 1.** Baseline characteristics stratified by completed data and missing data on rest heart rate from Kailuan cohort study

| Characteristic           | Completed data | Missing rest heart rate | <i>P</i> |
|--------------------------|----------------|-------------------------|----------|
| No. of subjects          | 47311          | 8930                    |          |
| Age, year                | 48.70 ± 11.68  | 51.78 ± 12.78           | <0.001*  |
| Men, n (%)               | 37010 (78.2)   | 5929 (66.4)             | <0.001#  |
| Current smoker, n (%)    | 14480 (30.6)   | 2346 (27.3)             | <0.001#  |
| Current drinker, n (%)   | 8471 (17.9)    | 1348 (15.7)             | <0.001#  |
| Physical activity, n (%) | 6424 (13.6)    | 1333 (16.4)             | <0.001#  |
| SBP, mmHg                | 128.61 ± 19.90 | 127.03 ± 20.15          | <0.001*  |
| DBP, mmHg                | 82.73 ± 11.40  | 81.31 ± 11.20           | <0.001*  |
| BMI, kg/m <sup>2</sup>   | 25.06 ± 3.47   | 25.04 ± 3.49            | 0.678*   |
| FBG, mmol/L              | 5.40 ± 1.54    | 5.36 ± 1.56             | 0.011*   |
| TC, mmol/L               | 4.94 ± 1.14    | 4.89 ± 1.10             | 0.002*   |
| HDL-C, mmol/L            | 1.56 ± 0.40    | 1.50 ± 0.36             | <0.001*  |
| LDL-C, mmol/L            | 2.30 ± 0.92    | 2.25 ± 0.78             | <0.001*  |
| Hypertension, n (%)      | 19174 (40.5)   | 3334 (37.3)             | 0.001#   |
| Diabetes mellitus, n (%) | 4816 (10.2)    | 807 (9.0)               | 0.001#   |
| Hyperlipidemia, n (%)    | 22045 (46.6)   | 4072 (45.5)             | 0.064#   |
| Stroke, n (%)            | 628 (1.3)      | 233 (2.6)               | <0.001#  |
| Cancer, n (%)            | 126 (0.3)      | 37 (0.5)                | 0.006#   |

Data shown as mean±SD or frequency (percentage).

Key: SBP, systolic blood pressure; DBP, Diastolic blood pressure; RHR, resting heart rate; BMI, body mass index; FBG, fasting blood glucose; TC, total cholesterol; HDL-C, higher-density lipoprotein cholesterol; LDL-C, low-density lipoprotein cholesterol.

\*Analysis of variance test (ANOVA) or Kruskal-Wallis test used for continuous variables;

# $\chi^2$  test used for categorical variables.

**Supplemental Table 2.** Baseline characteristics of 47,311 men and women stratified by the number of higher RHR status

| Characteristic           | Total              | The number of visits with a higher RHR ( $\geq 80$ beats/min) |                    |                    |                    | <i>P</i> |
|--------------------------|--------------------|---------------------------------------------------------------|--------------------|--------------------|--------------------|----------|
|                          |                    | Never                                                         | At 1 study visit   | At 2 study visits  | At 3 study visits  |          |
| No. of subjects          | 47311              | 29690                                                         | 11105              | 4816               | 1700               |          |
| Age, year                | 48.70 $\pm$ 11.68  | 49.07 $\pm$ 11.59                                             | 48.24 $\pm$ 11.76  | 47.75 $\pm$ 11.83  | 47.82 $\pm$ 12.10  | <0.001*  |
| Men, n (%)               | 37010 (78.2)       | 22831 (76.9)                                                  | 8862 (79.8)        | 3929 (81.6)        | 1388 (81.6)        | <0.001#  |
| Current smoker, n (%)    | 14480 (30.6)       | 8491 (28.6)                                                   | 3590 (32.3)        | 1754 (36.4)        | 645 (37.9)         | <0.001#  |
| Current drinker, n (%)   | 8471 (17.9)        | 5041 (17.0)                                                   | 2079 (18.7)        | 977 (20.3)         | 374 (22.0)         | <0.001#  |
| Physical activity, n (%) | 6424 (13.6)        | 4350 (14.7)                                                   | 1311 (11.8)        | 563 (11.7)         | 200 (11.8)         | <0.001#  |
| SBP, mmHg                | 126.81 $\pm$ 19.90 | 126.73 $\pm$ 19.14                                            | 130.24 $\pm$ 20.19 | 133.63 $\pm$ 21.21 | 136.45 $\pm$ 21.70 | <0.001*  |
| DBP, mmHg                | 82.73 $\pm$ 11.40  | 81.57 $\pm$ 10.87                                             | 83.87 $\pm$ 11.63  | 85.84 $\pm$ 12.43  | 86.75 $\pm$ 12.53  | <0.001*  |
| RHR, beats/min           | 73.41 $\pm$ 9.83   | 69.43 $\pm$ 6.56                                              | 76.89 $\pm$ 9.23   | 83.11 $\pm$ 10.38  | 92.71 $\pm$ 9.08   | <0.001*  |
| BMI, kg/m <sup>2</sup>   | 25.06 $\pm$ 3.47   | 25.03 $\pm$ 3.04                                              | 25.05 $\pm$ 3.48   | 25.23 $\pm$ 3.73   | 25.05 $\pm$ 3.70   | 0.030*   |
| FBG, mmol/L              | 5.40 $\pm$ 1.54    | 5.27 $\pm$ 1.35                                               | 5.50 $\pm$ 1.64    | 5.79 $\pm$ 1.93    | 6.02 $\pm$ 2.09    | <0.001*  |
| TC, mmol/L               | 4.94 $\pm$ 1.14    | 4.88 $\pm$ 1.23                                               | 4.98 $\pm$ 1.12    | 5.11 $\pm$ 1.18    | 5.15 $\pm$ 1.20    | <0.001*  |
| HDL-C, mmol/L            | 1.56 $\pm$ 0.40    | 1.55 $\pm$ 0.40                                               | 1.56 $\pm$ 0.40    | 1.58 $\pm$ 0.41    | 1.59 $\pm$ 0.42    | <0.001*  |
| LDL-C, mmol/L            | 2.30 $\pm$ 0.92    | 2.26 $\pm$ 0.93                                               | 2.34 $\pm$ 0.90    | 2.46 $\pm$ 0.93    | 2.44 $\pm$ 0.90    | <0.001*  |
| Hypertension, n (%)      | 19174 (40.5)       | 11017 (37.1)                                                  | 4806 (43.3)        | 2422 (50.3)        | 929 (54.6)         | <0.001#  |
| Diabetes mellitus, n (%) | 4816 (10.2)        | 2729 (9.2)                                                    | 1136 (10.2)        | 660 (13.7)         | 291 (17.1)         | <0.001#  |
| Hyperlipidemia, n (%)    | 22045 (46.6)       | 13186 (44.4)                                                  | 5345 (48.1)        | 2576 (53.5)        | 938 (55.2)         | <0.001#  |
| Stroke, n (%)            | 628 (1.3)          | 397 (1.3)                                                     | 142 (1.3)          | 76 (1.6)           | 13 (0.8)           | 0.084#   |
| Cancer, n (%)            | 126 (0.3)          | 75 (0.3)                                                      | 18 (0.2)           | 27 (0.6)           | 6 (0.4)            | <0.001#  |

Data shown as mean  $\pm$  SD or frequency (percentage).

Key: SBP, systolic blood pressure; DBP, Diastolic blood pressure; RHR, resting heart rate; BMI, body mass index; FBG, fasting blood glucose; TC, total cholesterol; HDL-C, higher-density lipoprotein cholesterol; LDL-C, low-density lipoprotein cholesterol.

\* Analysis of variance test (ANOVA) or Kruskal-Wallis test used for continuous variables;

# $\chi^2$  test used for categorical variables.

**Supplemental Table 3.** Hazard ratios (95% CI) for all-cause mortality according to time-weighted cumRHR

| RHR [(beat/min)*year] | Participants<br>(No.) | Death<br>(No.) | Mortality<br>rate* | Hazard ratio (95% CI)# |                  |                  |                  |
|-----------------------|-----------------------|----------------|--------------------|------------------------|------------------|------------------|------------------|
|                       |                       |                |                    | Model 1†               | Model 2‡         | Model 3§         | Model 4          |
| Change per SD (8.05)  | 47311                 | 1025           | 54.43              | 1.20 (1.13-1.27)       | 1.26 (1.20-1.34) | 1.22 (1.15-1.30) | 1.30 (1.20-1.41) |
| Quartiles             |                       |                |                    |                        |                  |                  |                  |
| Q1:<68.70             | 11822                 | 220            | 47.11              | 1(Reference)           | 1(Reference)     | 1(Reference)     | 1(Reference)     |
| Q2:68.70-73.20        | 11829                 | 224            | 47.34              | 1.01 (0.84-1.21)       | 1.17 (0.97-1.41) | 1.17 (0.96-1.43) | 1.19 (0.97-1.46) |
| Q3:73.20-78.26        | 11833                 | 252            | 53.64              | 1.14 (0.95-1.36)       | 1.34 (1.11-1.60) | 1.30 (1.08-1.58) | 1.34 (1.09-1.64) |
| Q4:≥78.26             | 11827                 | 329            | 69.89              | 1.48 (1.25-1.76)       | 1.80 (1.52-2.14) | 1.67 (1.39-2.01) | 1.77 (1.41-2.21) |
| <i>P</i> for trend    |                       |                |                    | <0.001                 | <0.001           | <0.001           | <0.001           |

# Hazard ratio (95% CI) was calculated from Cox models

\*Mortality rate per 10,000 person-years

†Univariate analysis

‡Adjusted for age, sex.

§Adjusted for age, sex, mean systolic blood pressure, smoking, drinking, physical activity, body mass index, hypertension, diabetes mellitus, hyperlipidemia, stroke and cancer.

||Adjusted for risks factor in model 3 plus baseline resting heart rate.

**Supplemental Table 4.** Hazard ratios (95% CI) for all-cause mortality according to baseline resting heart rate

| RHR [(beat/min)*year] | Participants<br>(No.) | Death<br>(No.) | Mortality<br>rate* | Hazard ratio (95% CI)# |                  |                  |
|-----------------------|-----------------------|----------------|--------------------|------------------------|------------------|------------------|
|                       |                       |                |                    | Model 1†               | Model 2‡         | Model 3§         |
| Change per SD (9.83)  | 47311                 | 1025           | 54.43              | 1.07 (1.00-1.13)       | 1.13 (1.07-1.20) | 1.11 (1.05-1.18) |
| Quartiles             |                       |                |                    |                        |                  |                  |
| Q1:<68.00             | 10666                 | 232            | 55.06              | 1(Reference)           | 1(Reference)     | 1(Reference)     |
| Q2:68.00-72.00        | 11102                 | 221            | 49.76              | 0.91 (0.75-1.09)       | 1.13 (0.94-1.36) | 1.09 (0.89-1.33) |
| Q3:72.00-79.00        | 13047                 | 271            | 52.32              | 0.93 (0.78-1.11)       | 1.07 (0.90-1.28) | 1.03 (0.89-1.24) |
| Q4:≥79.00             | 12496                 | 301            | 60.52              | 1.10 (0.93-1.30)       | 1.37 (1.16-1.63) | 1.23 (1.03-1.48) |
| <i>P</i> for trend    |                       |                |                    | 0.108                  | 0.002            | 0.093            |

# Hazard ratio (95% CI) was calculated from Cox models

\*Mortality rate per 10, 000 person-years

†Univariate analysis

‡Adjusted for age, sex.

§Adjusted for age, sex, mean systolic blood pressure, smoking, drinking, physical activity, body mass index, hypertension, diabetes mellitus, hyperlipidemia, stroke and cancer.
